1 Long title: Medical students' and educators' opinions of teleconsultation  
2 in practice and undergraduate education: a UK-based mixed-methods  
3 study

4  
5 Short title: Medical students' and educators' opinions of teleconsultation  
6 practice and education

7

8 Lisa-Christin Wetzlmair<sup>1</sup>, Andrew O'Malley<sup>2</sup>, Veronica O'Carroll\*<sup>2</sup>

9

10

11 <sup>1</sup> European Centre for Environment and Human Health, University of Exeter, Penryn,  
12 Cornwall, England (United Kingdom)

13

14 <sup>2</sup> School of Medicine, University of St Andrews, St Andrews, Scotland (United Kingdom)

15

16

17 \* Corresponding author

18

19 E-mail: vo1@st-andrews.ac.uk

20

## 21 Abstract

22 **Introduction:** As information and communication technology continues to shape the  
23 healthcare landscape, future medical practitioners need to be equipped with skills and  
24 competencies that ensure safe, high-quality, and person-centred healthcare in a  
25 digitised healthcare system. This study investigated undergraduate medical students'  
26 and medical educators' opinions of teleconsultation practice in general and their  
27 opinions of teleconsultation education.

28 **Methods:** This study used a cross-sectional, mixed-methods approach, utilising the  
29 additional coverage design to sequence and integrate qualitative and quantitative data.  
30 An online questionnaire was sent out to all medical schools in the UK, inviting  
31 undergraduate medical students and medical educators to participate. Questionnaire  
32 participants were given the opportunity to take part in a qualitative semi-structured  
33 interview. Descriptive and correlation analyses and a thematic analysis were conducted.

34 **Results:** A total of 248 participants completed the questionnaire and 23 interviews were  
35 conducted. Saving time and the reduced risks of transmitting infectious diseases were  
36 identified as common advantages of using teleconsultation. However, concerns about  
37 confidentiality and accessibility to services were expressed by students and educators.  
38 Eight themes were identified from the thematic analysis. The themes relevant to  
39 teleconsultation practice were (1) The benefit of teleconsultations, (2) A second-best  
40 option, (3) Patient choice, (4) Teleconsultations differ from in-person interactions, and  
41 (5) Impact on the healthcare system. The themes relevant to teleconsultation education

42 were (6) Considerations and reflections on required skills, (7) Learning and teaching  
43 content, and (8) The future of teleconsultation education.

44 **Discussion:** The results of this study have implications for both medical practice and  
45 education. Patient confidentiality, safety, respecting patients' preferences, and  
46 accessibility are important considerations for implementing teleconsultations in practice.  
47 Education should focus on assessing the appropriateness of teleconsultations, offering  
48 accessible and equal care, and developing skills for effective communication and  
49 clinical reasoning. High-quality teleconsultation education can influence teleconsultation  
50 practice.

51

52 **Keywords**

53 Teleconsultation; telehealth; digital health; medical education; mixed methods

54

## 55 Introduction

56 Telehealth uses technology synchronously or asynchronously to deliver, manage,  
57 coordinate, and evaluate health and well-being services remotely (1–4). The utilised  
58 technologies cover a range of methods such as real-time remote encounters with  
59 healthcare professionals over email, telephone, or video-call, or the access to  
60 educational material or electronically stored healthcare information (for example in  
61 electronic health records) (5). The integration of telehealth in healthcare practice and  
62 education can revolutionise the way future and present healthcare professionals learn,  
63 practice, and ultimately deliver patient care. The use of telehealth services will continue  
64 to shape the global healthcare landscape (6,7) as healthcare systems worldwide face  
65 challenges such as workforce shortage and the increased complexity of long-term  
66 conditions and multimorbidity. The COVID-19 pandemic put additional stress on  
67 healthcare systems (8) and prompted a surge in telehealth services offered to patients  
68 and the publication of telehealth policies and guidelines between 2020 and 2022 (9–12).  
69 Telehealth could mitigate against, for example, limited human resources, equipment,  
70 and health facilities by accelerating access to information for healthcare professionals  
71 and increasing accessibility to services for various patient and population groups  
72 (13,14).

73 One essential sub-service of telehealth is teleconsultation, which can increase patients'  
74 accessibility to healthcare and reportedly allows the extension of healthcare services to  
75 remote and rural areas (1,15,16). Teleconsultations are defined as direct, synchronous,  
76 or asynchronous consultations between healthcare professionals and patients using

77 communication technologies such as phone or video calls, or emails (17). Evidence-  
78 based evaluations have shown similar patient outcomes for in-person and  
79 teleconsultations in primary care and mental health services (18). The use of  
80 teleconsultations has been shown to improve patient management, decrease referral  
81 rates and the number of medical procedures, and shorten diagnostic times (17).  
82 Although patients have reported benefits of and satisfaction with teleconsultations  
83 (19,20), concerns have also been highlighted from the practitioners' perspectives such  
84 as increased workload based on an increase in demand for teleconsultations (20,21).  
85 Additionally, in some instances, dissatisfaction with in-person consultations following an  
86 initial remote consultation has been reported from both patient and practitioner  
87 perspectives. Evaluations of teleconsultation platforms in the UK showed that  
88 healthcare professionals prefer to use teleconsultations only "for routine follow-up of  
89 chronic, stable conditions" over acute conditions (20,22). Nevertheless,  
90 teleconsultations are often utilised in acute care settings such as out-of-hours services  
91 or clinical triaging for emergencies (23).

92 During the pandemic, Universities utilised teleconsultation platforms to ensure that  
93 medical education continued during governmental lockdowns (24–26). This was  
94 implemented out of necessity to ensure that students continued to have patient contact.  
95 The volume of teleconsultation experience is likely to have been a stark contrast to the  
96 limited teleconsultation education featured in health and social care programmes prior  
97 to the pandemic, as reported in a systematic review by Wetzlmair et al. (27). This review  
98 highlighted that good quality teleconsultation education is vital for encouraging effective  
99 teleconsultation practice. Previous studies have reported that teleconsultation education

100 at the pre-registration or pre-qualification level ultimately ensures safe and high-quality  
101 remote healthcare for patients (21,28), as education initiatives can ensure that medical  
102 education meets the requirements and needs of the health and social care sector  
103 (29,30). However, only tailored education increases the likelihood of successful  
104 implementation of teleconsultation services and benefits practitioners' knowledge, skills,  
105 and attitudes (31,32).

106 Thomas et al. (33) identified education and training of both future and current workforce  
107 as key to ensuring sustainable and safe teleconsultations. A skilled and competent  
108 healthcare workforce should not only use technology competently and effectively, but  
109 should also be able to assess potential implications of the used technology on patients'  
110 safety, access to health and social care, and ethical and legal consequences (34–37).

111 As the COVID-19 pandemic accelerated the use of teleconsultations across the health  
112 and social care sector (38,39) and the use of teleconsultation continues to expand, the  
113 education of present and future practitioners will become crucial. However, with limited  
114 educational frameworks and standardised teleconsultation integration into healthcare  
115 curricula (40), healthcare professionals may not be provided with the opportunities to  
116 build the competencies and confidence they need, to be able to work in a digitised  
117 healthcare system (29,33,41). As teleconsultations are only sporadically integrated into  
118 most medical curricula (27), medical education and research need to investigate factors  
119 that inform the development and ultimately implementation of teleconsultation  
120 education.

121 This paper focuses on the findings related to two objectives of a larger study undertaken  
122 as part of a PhD. The PhD study aimed to investigate the factors that inform the

123 development of teleconsultation education in undergraduate medical education in the  
124 UK. The two objectives focused on in this paper are:  
125 a) to determine the opinions of undergraduate medical students and medical educators  
126 on teleconsultation applied in healthcare practice,  
127 b) to determine the opinions of undergraduate medical students and medical educators  
128 on teleconsultation utilised in educational settings.

129

## 130 Methods

131 This study used a cross-sectional, convergent mixed-methods study design (Figure 1)  
132 where both quantitative and qualitative data collection methods occurred simultaneously  
133 (42–44) to investigate undergraduate medical students' and medical educators' opinions  
134 of teleconsultation practice and education in the UK. This mixed methods model  
135 enables the researcher to address different aspects of the research questions and  
136 compare, contrast, and correlate results to provide more comprehensive information for  
137 the interpretation of the results (45,46). The results from this study were analysed  
138 separately and integrated during data interpretation.

139 **[Figure 1:** Illustration of a convergent mixed-methods design with qualitative priority and quantitative  
140 input, based on (45–48). \*Delay due to the optional sign-up after responding to the questionnaire.]

141 Both research design and research methods followed a mixture of constructivist and  
142 post-positivist approaches, with more emphasis put on the constructivist paradigm. A-  
143 priori decisions on sequencing priorities and assumptions on how to integrate

144 quantitative and qualitative methods were made and influenced by the research  
145 paradigm.

## 146 Development and administration of the research instruments

147 The development of the questionnaire was informed by the Technology Acceptance  
148 Model (TAM) (49) and findings from a systematic literature review related to commonly  
149 reported teaching methods (27). Items were assessed for their validity and reliability  
150 (50) by three independent researchers (VOC, AOM, LCW) and were subject to a test-  
151 retest approach involving five medical students and five medical educators. The  
152 questionnaire was administered using the online software Qualtrics (51). The final  
153 version of the questionnaire (S1 Appendix) comprised a total of 29 questions. Display  
154 logic was introduced as not all questions were equally relevant to all participants. Most  
155 questions were closed, requiring participants to indicate a response from single or  
156 multiple-choice options and five-point Likert scale responses. These scales assessed  
157 the strength of agreement related to perceived usefulness and perceived ease of use of,  
158 attitudes towards, and difficulties in the use of teleconsultations. The final questions  
159 asked participants to rank the perceived advantages and disadvantages for patients and  
160 healthcare professionals using teleconsultations. The ranking items derived from the  
161 literature and are summarised in the S2 Appendix. The questionnaire ended with an  
162 open-ended question, enabling participants to provide further comments on the  
163 perceived advantages and disadvantages of teleconsultations in clinical practice and  
164 medical education.



165 A topic guide (S3 Appendix) was used to guide the discussion in the semi-structured  
166 interviews. The topic guide was based on the research objectives, specifically the  
167 objective of gaining a more in-depth understanding of personal opinions of  
168 teleconsultation practice and medical education at UK medical schools. The interviews  
169 were conducted remotely by one researcher (LCW) utilising the software Microsoft  
170 Teams (52) between the 14<sup>th</sup> of June 2021 and the 16<sup>th</sup> of March 2022. A real-time  
171 analysis of the first ten interviews ensured that the interviewer (LCW) adhered to the  
172 interview guide (53).

## 173 Recruitment and sampling

174 Medical educators working in a clinical and/or academic setting in the UK and  
175 undergraduate medical students from all year groups studying at a UK medical school  
176 were eligible to participate in the study. The online questionnaire was distributed to  
177 medical students studying in university in the UK and to medical educators working  
178 within academic and/or healthcare settings in the UK between the 19<sup>th</sup> of May 2021 to  
179 the 13<sup>th</sup> of March 2022. After completing the questionnaire, participants were given the  
180 option to participate in a semi-structured interview. Written consent was obtained on the  
181 first page of the questionnaire. Interview participants consented to the interview via  
182 email prior to the interview.

183 The recruitment techniques for the quantitative aspect of the study were cluster,  
184 convenience, and snowball sampling (54). For the initial sampling strategy, a cluster of  
185 all medical schools in the UK (to date 2020, n=42) was created and a participant  
186 recruitment letter was sent to the Heads of Schools asking them to distribute the link to

187 the questionnaire to their undergraduate medical students and medical educators  
188 affiliated with the respective school. In addition, separate emails were sent to the  
189 medical directors of Wales (n=1) and Northern Ireland (n=5) and to the Directors of  
190 Medical Education within Scottish health boards (n=15). Convenience sampling referred  
191 to the sampling strategy utilising the social media platform X (formerly Twitter) to recruit  
192 contacts known to the research team. Those contacts (“gatekeeper”, n=7) were  
193 clinicians with involvement in undergraduate medical education across the UK. A  
194 snowball sampling technique was applied by encouraging gatekeepers and interview  
195 participants to distribute the questionnaire to their study and work colleagues. The  
196 qualitative sampling technique was based on self-selection. All study participants who  
197 participated in the online questionnaire were offered the option to participate in a semi-  
198 structured interview.

199 Data collection was initiated after the initial ethics approval received from the School of  
200 Medicine at the University of St Andrews (approval code MD15263). Two ethical  
201 amendments were approved to reflect changes to the initial recruitment strategy.  
202 Additional approval and permission to undertake the research was provided by the UK  
203 Medical Schools Council (MSC), and individual UK medical schools upon request.

## 204 Data analysis

205 The quantitative data analysis was based on descriptive and correlation analyses. To  
206 align with the objectives of this paper, only a subsection of the questionnaire items was  
207 included in the quantitative analysis. These items included: demographical questions,  
208 ranking tasks regarding advantages and disadvantages perceived from a healthcare

209 professional and patient perspective, and opinions of the inclusion of teleconsultation  
210 education within the UK medical curriculum. Participant characteristics were reported by  
211 measure of central tendency (mean, standard deviation) (55). The Spearman-rank  
212 correlation method was applied to the categorical variables (56) and is subsequently  
213 reported with the coefficient  $\rho$  (rho). The ranking items were analysed using frequencies  
214 and utilised a weighted average of the responses to account for the weight (i.e.  
215 importance) of the responses (57). In a two-step approach, a rank score (RS) was  
216 calculated by multiplying the number of responses of each item with the “weight” of the  
217 answer (e.g. 7 is the most important advantage, 1 is the least important advantage).  
218 This RS was then divided by the total number of responses. The quantitative data  
219 analysis was performed utilising the Statistical Package for Social Sciences (SPSS),  
220 version 26 (58), and Microsoft Excel (59).

221 The qualitative data included the verbatim transcribed interview data and responses to  
222 the open-ended items in the questionnaire. The data was analysed thematically, utilising  
223 an inductive, organic analysis, mainly guided by the school of reflexive thematic  
224 analysis (53). After an initial coding phase, one author (LCW) named, defined, and  
225 described codes in a codebook. This codebook was shared with two other researchers  
226 (VOC, AOM) who each coded six different transcripts independently to ensure  
227 transparency, reliability, and validity (53,60). An inter-coder-reliability was calculated  
228 and a threshold of 80% agreement was defined. Agreement rates above 80% were not  
229 subject to further discussions. Rates below 80% were not accepted, hence differences  
230 in coding were investigated and discussed between the researchers until a consensus

231 was found. Data analysis of the interview transcripts and the open-ended questionnaire  
 232 item was conducted in NVivo (61).

## 233 Results

### 234 Quantitative Analysis

235 A total of 240 questionnaire responses were considered for statistical analysis.

236 Participant characteristics are summarised in Table 1.

|                      |                             | Medical students |               | Medical educators |               | Total    |              |
|----------------------|-----------------------------|------------------|---------------|-------------------|---------------|----------|--------------|
|                      |                             | n                | %             | n                 | %             | n        | %            |
| <b>Gender</b>        | Questionnaire (Interview)   | 153 (13)         | 63.75 (56.52) | 87 (10)           | 36.25 (43.48) | 240      | 100          |
|                      | Female (Interview)          | 118 (9)          | 77.1 (69.23)  | 47 (6)            | 54.0 (60.00)  | 165 (15) | 68.8 (65.22) |
|                      | Male (Interview)            | 31 (4)           | 20.3 (30.77)  | 36 (4)            | 41.4 (40.00)  | 67 (8)   | 27.9 (34.78) |
|                      | Non-binary                  | 1                | .7            | 2                 | 2.3           | 3        | 1.3          |
|                      | Prefer not to say           | 3                | 2.0           | 2                 | 2.3           | 5        | 2.1          |
| <b>UK Country</b>    |                             | 144              | 94.1          | 80                | 92.0          | 224      | 93.3         |
|                      | England (Interview)         | 91 (6)           | 59.5 (54.55)  | 31 (5)            | 35.6 (45.45)  | 122 (12) | 50.8 (52.17) |
|                      | Northern Ireland            | 0                | 0             | 2                 | 2.3           | 2        | .8           |
|                      | Scotland (Interview)        | 53 (7)           | 34.6 (58.33)  | 40 (5)            | 46.0 (50.0)   | 93 (11)  | 38.8 (47.38) |
|                      | Wales                       | 0                | 0             | 5                 | 5.7           | 5        | 2.1          |
|                      | England and Scotland        | 0                | 0             | 2                 | 2.3           | 2        | .8           |
| <b>Education</b>     |                             | 152              | 99.3          | 78                | 89.7          | 230      | 95.8         |
|                      | High School                 | 46               | 30.1          | 0                 | 0             | 46       | 19.2         |
|                      | College / Further Education | 39               | 25.5          | 1                 | 1.1           | 40       | 16.7         |
|                      | Bachelor's Degree           | 47               | 30.7          | 16                | 18.4          | 63       | 26.3         |
|                      | Master's Degree             | 13               | 8.5           | 27                | 31.0          | 40       | 16.7         |
|                      | PhD                         | 3                | 2.0           | 17                | 19.5          | 20       | 8.3          |
|                      | MD                          | -                | -             | 10                | 11.5          | 10       | 4.2          |
|                      | Other                       | 4                | 2.6           | 7                 | 8.0           | 11       | 4.6          |
| <b>Year of Study</b> |                             | 92               | 60.13         |                   |               |          |              |
|                      | Year 1                      | 36               | 23.5          |                   |               |          |              |
|                      | Year 2                      | 38               | 24.8          |                   |               |          |              |
|                      | Year 3                      | 23               | 15.0          |                   |               |          |              |
|                      | Year 4                      | 31               | 20.3          |                   |               |          |              |
|                      | Year 5                      | 11               | 7.2           |                   |               |          |              |

|  |               |   |     |  |  |  |  |
|--|---------------|---|-----|--|--|--|--|
|  | Year 6        | 6 | 3.9 |  |  |  |  |
|  | Intercalating | 0 | 0   |  |  |  |  |

237 **Table 1:** Participants' characteristics stratified by their role in medical education (i.e. medical students and  
238 medical educators)

239 Regarding the level of education, half the students reported that they had completed  
240 education at a high school or college level (55.6%). Forty-seven reported having a  
241 Bachelor's degree (30.7%) and 13 had a Master's degree (8.5%). Three participants  
242 had a PhD (2.0%). Half of the students were in their first (n=36, 23.5%) or second year  
243 (n=38, 24.8%) of medical education, 23 students (15.0%) and 31 students (20.3%) were  
244 in their third or fourth year, respectively. Year five and year six were attended by eleven  
245 (7.2%) and six (3.9%) students, respectively. No student was intercalating when they  
246 completed the questionnaire. Amongst the medical educators, most participants had a  
247 Master's degree (n=27, 31.0%). A further 17 (19.5%) and 10 (11.5%) had a PhD or MD,  
248 respectively. Medical educators working in both settings (n=34) reported that they spent,  
249 on average, more hours in a healthcare setting ( $\bar{x}$ =23.89,  $sd$ =15.42) than in an  
250 academic setting ( $\bar{x}$ =15.07,  $sd$ =12.24).

251 Participants' opinions of the advantages and disadvantages of teleconsultations are  
252 summarised in Table 2 and Table 3, respectively. The advantages reported by  
253 healthcare professionals were ranked by 155 participants. The two most important  
254 advantages included the reduction of transmitting contagious diseases ( $\bar{x}$ =5.37,  
255  $RS$ =833) and easier accessibility to remote populations ( $\bar{x}$ =5.23,  $RS$ =810). The  
256 avoidance of unnecessary medical procedures was the only item ranked on average  
257 between second to last or last ( $\bar{x}$ =1.89,  $RS$ =293). Disadvantages were ranked by 153  
258 participants. The results were more bimodal than the perceived advantages: half of the

259 items scored on average between first and second place: Experiencing technical  
 260 problems and concerns about confidentiality were both rated the same and perceived  
 261 as important disadvantages ( $\bar{x}$ =4.22, RS=645). The most important disadvantage was  
 262 the limitations in physical examination ( $\bar{x}$ =4.99, RS=764). The perception that delivering  
 263 difficult or upsetting news is harder was perceived as the last important ( $\bar{x}$ =2.32,  
 264 RS=355) disadvantage of teleconsultations. Advantages from a patient perspective  
 265 were ranked by 146 participants. The perceived time-saving component was the most  
 266 important advantage ( $\bar{x}$ =5.86, RS=856). Similar to healthcare professionals, the  
 267 avoidance of unnecessary medical procedures was the least important perceived  
 268 advantage ( $\bar{x}$ =1.72, RS=251). A total of 150 participants ranked the disadvantage from  
 269 a patient perspective. Access to technology ( $\bar{x}$ =4.33, RS=650) and potential risks for  
 270 miscommunication due to the limited use of non-verbal cues ( $\bar{x}$ =4.25, RS=637) were the  
 271 most important disadvantages. Unlike the ranking for healthcare professionals, from a  
 272 patient perspective, confidentiality concerns were perceived as the least important ( $\bar{x}$   
 273 =1.82, RS=273) disadvantage of teleconsultations.

| Healthcare professionals<br>N=155 | 7  | 6  | 5  | 4  | 3  | 2  | 1  | Rank<br>Score | Weighted<br>average |
|-----------------------------------|----|----|----|----|----|----|----|---------------|---------------------|
| Time                              | 29 | 27 | 33 | 22 | 19 | 16 | 9  | 716           | 4.62                |
| Cost                              | 8  | 13 | 19 | 32 | 33 | 30 | 20 | 536           | 3.46                |
| Transmission                      | 55 | 35 | 22 | 18 | 12 | 7  | 6  | 833           | 5.37                |
| Long-term conditions              | 11 | 23 | 24 | 33 | 37 | 19 | 8  | 624           | 4.03                |
| Access to remote population       | 42 | 40 | 26 | 19 | 17 | 8  | 3  | 810           | 5.23                |
| Interprofessional Collaboration   | 7  | 14 | 27 | 22 | 24 | 39 | 22 | 528           | 3.41                |
| Unnecessary medical<br>procedures | 3  | 3  | 4  | 9  | 13 | 36 | 87 | 293           | 1.89                |
| Patients<br>N=146                 |    |    |    |    |    |    |    |               |                     |
| Time                              | 69 | 34 | 17 | 13 | 8  | 3  | 2  | 856           | 5.86                |
| Cost                              | 6  | 48 | 32 | 25 | 13 | 12 | 10 | 663           | 4.54                |
| Transmission                      | 41 | 23 | 32 | 24 | 15 | 4  | 7  | 741           | 5.08                |

|                                                               |    |    |    |    |    |    |    |     |      |
|---------------------------------------------------------------|----|----|----|----|----|----|----|-----|------|
| Long-term conditions                                          | 3  | 13 | 30 | 33 | 29 | 29 | 9  | 535 | 3.66 |
| Underserved areas                                             | 20 | 13 | 23 | 29 | 41 | 14 | 6  | 606 | 4.15 |
| Consult with multiple healthcare professionals simultaneously | 5  | 11 | 11 | 16 | 29 | 55 | 19 | 436 | 2.99 |
| Unnecessary medical procedures                                | 2  | 4  | 1  | 6  | 11 | 29 | 93 | 251 | 1.72 |

274 **Table 2:** Results of the ranking item regarding the perceived advantages of teleconsultations from the  
 275 perspective of healthcare professionals and patients. Scale from 1 (least important) to 7 (most important).

276

277 Medical students' opinions of the implementation of teleconsultation in the medical  
 278 curriculum are significantly positively correlated with previous exposure in clinical  
 279 placements ( $\rho = .205$ ;  $p = .038$ ); however, previous exposure in academic learning  
 280 environments is insignificantly negatively correlated ( $\rho = -.113$ ;  $p = .225$ ) with positive  
 281 attitudes towards integrating teleconsultation in undergraduate medical education.

282 There was no significant correlation between medical educators offering  
 283 teleconsultations in a healthcare setting ( $\rho = -.030$ ;  $p = .825$ ) and teaching  
 284 teleconsultation in an academic setting ( $\rho = .257$ ;  $p = .051$ ) and their inclination to  
 285 implement teleconsultation in the medical curriculum.

| Healthcare professionals<br>N=153 | 6  | 5  | 4  | 3  | 2  | 1  | Rank<br>Score | Weighted<br>average |
|-----------------------------------|----|----|----|----|----|----|---------------|---------------------|
| Technical problems                | 27 | 44 | 43 | 21 | 10 | 8  | 645           | 4.22                |
| Physical examination              | 73 | 39 | 22 | 9  | 6  | 4  | 764           | 4.99                |
| Resources                         | 8  | 7  | 31 | 47 | 40 | 20 | 448           | 2.93                |
| Trained                           | 3  | 9  | 18 | 27 | 48 | 48 | 360           | 2.35                |
| Confidentiality                   | 27 | 44 | 43 | 21 | 10 | 8  | 645           | 4.22                |
| Breaking bad news                 | 5  | 11 | 16 | 26 | 33 | 62 | 355           | 2.32                |
| Patients<br>N=150                 |    |    |    |    |    |    |               |                     |
| Technical problems                | 30 | 25 | 32 | 23 | 23 | 17 | 565           | 3.77                |
| Limited non-verbal cues           | 41 | 28 | 31 | 31 | 15 | 4  | 637           | 4.25                |
| Access to technology              | 38 | 41 | 29 | 23 | 13 | 6  | 650           | 4.33                |
| Knowledge and competencies        | 16 | 35 | 23 | 26 | 42 | 8  | 533           | 3.55                |
| Confidentiality                   | 6  | 5  | 6  | 14 | 27 | 92 | 273           | 1.82                |

|                   |    |    |    |    |    |    |     |      |
|-------------------|----|----|----|----|----|----|-----|------|
| Breaking bad news | 19 | 16 | 29 | 33 | 30 | 23 | 492 | 3.28 |
|-------------------|----|----|----|----|----|----|-----|------|

286 **Table 3:** Results of the ranking item regarding the perceived disadvantages of teleconsultations from the  
 287 perspective of healthcare professionals and patients. Scale from 1 (least important) to 6 (most important).

## 288 Qualitative Analysis

289 A total of 23 interviews were conducted and analysed. 13 interview participants were  
 290 medical students and ten were medical educators. Nine students (69.23%) and six  
 291 educators (60.00%) identified as female. Participants were mainly geographically  
 292 located in England (n=12, 52.17%) and Scotland (n=11, 47.38%). A total of eight  
 293 themes were identified inductively from the thematic analysis. Five themes were related  
 294 to opinions of teleconsultation in clinical practice and three themes were related to  
 295 teleconsultation education (Table 4).

| Study objectives                       | Inductively identified themes                                                                                                                                                             |
|----------------------------------------|-------------------------------------------------------------------------------------------------------------------------------------------------------------------------------------------|
| Opinions on teleconsultation practice  | (1) The benefit of teleconsultations<br>(2) Patient choice<br>(3) A second-best option<br>(4) Teleconsultations differ from in-person interactions<br>(5) Impact on the healthcare system |
| Opinions on teleconsultation education | (6) Considerations and reflections on required skills<br>(7) Learning and teaching content<br>(8) The future of teleconsultation education                                                |

296 **Table 4:** Research objectives and identified themes.

## 297 Opinions of teleconsultation practice

### 298 *Theme 1: The benefits of teleconsultations*

299 As illustrated in the quotes below, participants highlighted the personal and professional  
 300 benefits of a hybrid approach to teleconsultations, comprising of a mix of in-person and  
 301 remote:



302 *I think probably the best way to manage it [telehealth] is to do a mixture of both that*  
303 *suits the parent and the child, but it should be seen as an adjunct, I think, rather than a*  
304 *sort of primary mode of assessment and intervention. – Interview #2 (Medical Educator,*  
305 *both settings)*

306 *... it's tricky and you gotta have the right sort of patient as well. I mean, some people*  
307 *just don't really bother open-up on the phone (...) at the rural practice I think it's got less*  
308 *of a place than in inner city because you've got internet problems, phone signal isn't*  
309 *there, infrastructure issues ... as well. – Interview #13(Student)*

310 *... so now we mostly do it [teleconsultation] based on what is best for the patients (...)*  
311 *so depends a lot on urgency and severity of illness, whether or not it's something that*  
312 *can be managed on the phone or whether or not you really need to go and speak to*  
313 *them because they might not want to speak to you on the phone as well so whatever*  
314 *the patient preferences – Interview #6 (Medical Educator, both settings)*

315 Teleconsultations were perceived to enable practitioners to work remotely and provide  
316 flexibility. Seeing patients in their personal environment, including caregivers and family  
317 members in the consultation, and observing the interactions between caregivers and  
318 patients might reveal essential information, which can contribute to a high-quality,  
319 patient-centred healthcare management plan:

320 *... but it you know what I mean I'd rather have Mary at home, the nurse doing that for*  
321 *them ... rather than drag Mary to my clinic. .... I did get a fair few patients with dementia*  
322 *as well, so I see them with their carer so that they are in their home environment, I'm not*

323 *removing them away from it so it becomes more safe and secure for them ... –*

324 *Interview #3 (Medical Educator, healthcare setting)*

### 325 *Theme 2: Patient choice*

326 Participants discussed the need for and benefit of patient choice in relation to using  
327 either face-to-face or remote consulting modalities to suit their needs:

328 *I mean the other thing we teach students as well is patient preference and patient*  
329 *choice, which is why I think from the pandemic we're not gonna go back to where we*  
330 *were. – Interview #2 (Medical Educator, both settings)*

331 *... giving the patient that autonomy to choose and be more involved in their healthcare, I*  
332 *think, is one of the main priorities 'cause everyone is all about the patient-centred care –*  
333 *Interview #14 (Student)*

334 The general understanding of patient choices was based on the opinions that patients  
335 preferred these options to be flexible in managing their time and patients habituated to  
336 remote consultations during the COVID-19 pandemic:

337 *What patients have realized is that they can fill in a e-consultation form to get their*  
338 *message across, to give to a practice to then slot into an appointment slot, whatever*  
339 *that may look like and of course they can request can I have a face to face or can I kind*  
340 *of have a teleconsultation because the default always used to be face-to-face. –*  
341 *Interview #3 (Medical Educator, both settings)*

### 342 *Theme 3: A second-best option*

343 Patient safety and accessibility were identified as some of the main drivers for  
344 perceiving teleconsultation services as the second-best option. Cognitive and physical

345 impairment and potentially differing levels of digital literacy amongst patients were  
346 considered as factors that may play a part in limiting accessibility to teleconsultations:

347 *Teleconsultations can put patient safety at risk from a global perspective. –*

348 *Questionnaire response #49 (Medical Educator, both settings)*

349 *The difficulty of actually getting hold of a healthcare professional, particularly if elderly or*  
350 *not technologically able. Many people feel like their doctor can just hide away and not*  
351 *be contacted. – Questionnaire response #195 (Student)*

352 *... probably the hardest thing is actually the patient side of the spectrum, really ... if*  
353 *you're dealing with a lot of older people or people who are not digitally literate, it makes*  
354 *things obviously also a lot harder, or if there's like learning difficulties at the other side or*  
355 *like aids like hearing aids you can't really account for that ... – Interview #8 (Student)*

#### 356 *Theme 4: Teleconsultations differ from in-person interactions*

357 Students as well as educators felt that that not all types of consultations with patients  
358 such as breaking bad news, discussing sensitive information, or where a patient needed  
359 to be examined were suitable for teleconsultations. Deciding before a consultation  
360 whether a teleconsultation would be an appropriate method to use over an in-person  
361 consultation was deemed important:

362 *I think there are certain things that you don't want to discuss over the phone. So, difficult*  
363 *news or very difficult conversations can be challenging over the phone and again, if*  
364 *someone is trying to bring up a difficult subject, particularly around mental health, you*  
365 *need to a lot of your assessment will be what they are and what they look like, and it*

366 *feels quite impersonal having these discussions on these topics without sitting face-to-*  
367 *face. – Interview #20, (Student)*

368 *And I think being clear what you can and can't do on a videoconsultation. We can do*  
369 *reasonably well with a history ... examination of the patient I think is quite limited. And*  
370 *so that will affect the type of consultation ... Some things will be suitable for a*  
371 *videoconsultation some things will not. – Interview #1 (Medical Educator, healthcare*  
372 *setting)*

373 *... also, that we cannot physically examine the patient and looking at a picture and*  
374 *looking at something in person is quite different ... – Interview #7 (Student)*

375 *Without the ability to perform physical examinations, care is less safe. Pts [patients] will*  
376 *be exposed to more harmful scans and tests to make up for the lack of physical*  
377 *examination – Questionnaire response #10 (Medical Educator, both settings)*

378 Medical students perceived that it was easier to build rapport and interpret and  
379 acknowledge non-verbal communication cues during in-person consultations compared  
380 to teleconsultations:

381 *... it's a lot easier if you're sitting with someone in a room to make them comfortable and*  
382 *relaxed, whereas if you're over Teams I don't know there's still that kind of barrier, it's*  
383 *not connected really. ... – Interview #19, (Student)*

384 *difficult to gauge mood, etc, difficult to gauge social circumstances, difficult to gauge*  
385 *gait for e.g. as part of a quick assessment of a patient. – Questionnaire response #62*  
386 *(Student)*

387 Educators with experience in academic and clinical learning environments highlighted  
388 the differences in information the practitioners can gather and professional relationships  
389 during remote consultations compared to in-person appointments:

390 *... they [clinicians, students] need to have an awareness that they're not getting the*  
391 *information or the whole picture that they probably need ... really a crucial piece of*  
392 *information might be missing. – Interview #2, (Medical Educator, both settings)*

393 *Doctor-patient relationship is strengthened by face-to-face meetings. – Questionnaire*  
394 *response #35 (Medical Educator, both settings)*

395 *I think students (...) can find that quite disruptive because they're already struggling a*  
396 *bit sometimes to get into the flow, and they're really focusing and trying their best to*  
397 *build a rapport and if their phone suddenly goes dead ... I think it throws them a bit, just*  
398 *like it throws me a bit, but I've got a bit more used to it. – Interview #6 (Medical*  
399 *Educator, both settings)*

#### 400 *Theme 5: Impact on the healthcare system*

401 Participants mainly perceived that teleconsultations did not save time in clinical practice  
402 and suggested that it might even introduce more complex working environments where  
403 hybrid appointments might duplicate work or increase the overall workload for  
404 practitioners:

405 A lot of patients end up needing to come in anyway for tests/examinations, so  
406 telecommunication prior to this seems like extra time used – *Questionnaire response*  
407 *#71 (Student)*

408 So, it's very important not to conflate the ideas that more telephone consultation equals

409 I can see more patients because that's totally wrong and at its worst telephone

410 consultations done badly leads to more work because the patients are left unfulfilled. –

411 Interview #3 (Medical Educator, both settings)

412 The ones [patients] that I send in to be seen face-to-face are the ones that should have

413 been face-to-face in the first place so one of the things about telemedicine is that you

414 select the right patients for your remote consultations. – Interview #4 (Medical Educator,

415 healthcare setting)

416 Students perceived that teleconsultations are most likely to be successful if the

417 coordination between medical practitioners and other members of the interprofessional

418 team is effective. Students mostly referred to the role of nurses or receptionists in

419 coordinating and triaging patients and the interprofessional collaboration between

420 specialist units and the patients' GPs:

421 I mean, triage systems run pretty well when they're nurse lead, I think, and sort of other

422 staff, I don't think putting another burden onto GP is necessarily the way to do it

423 because you've got them out there so that resource of a kind of other staff that are just

424 to be able to do it most of the time ... – Interview #13 (Student)

425 I feel like there'll be more training required so like see receptionists who take the GPs

426 calls. I think they should have a level of basic triage of like, right, don't even bother

427 having the online thing, come straight in, the doctor will see you, and I think that would

428 be a very interesting point. Meanwhile, when I was at the GPs, it was very much up to

429 the GP ... - Interview #18 (Student)

430 I feel like a collaboration with local GPs for this kind of service [routine follow-ups] would  
431 make the online consult service much more efficient. – Questionnaire response #233  
432 (Student)

433

## 434 Opinions of teleconsultation education in undergraduate medical education

### 435 *Theme 6: Considerations and reflections on required skills*

436 Interview participants had varying opinions of whether teleconsultations should be  
437 utilised in undergraduate medical education. Participants disagreed on whether medical  
438 students and practitioners require different skills and competencies for teleconsultations  
439 than for in-person consultations. Some participants stressed that teleconsultation skills  
440 and competencies can be acquired regardless of dedicated education:

441 *... in a way, I'm not sure how much training is needed or whether it's more that kind of*  
442 *experiential learning of just doing it and seeing what it's like. – Interview #4 (Medical*  
443 *Educator, healthcare setting)*

444 *... it [teleconsultation training] would be helpful, definitely but then I don't know I feel like*  
445 *there's so many other like priorities, that it's something that you end up just picking up*  
446 *you know ... – Interview #5 (Student)*

447 *If I can pick it [teleconsultation] up, I'm sure the younger generation as they come*  
448 *through (...) they might not even need specific training because they will just adapt quite*  
449 *easily. – Interview #3 (Medical Educator, healthcare setting)*

450 Other participants, however, saw the utilisation of teleconsultation education as a  
451 requirement for medical practitioners to navigate a digitised healthcare system:

452 *... I think it's actually a different skill (...) I'm just using the same history-taking style ...*  
453 *that I start using in person, but it doesn't always necessarily work quite as well I don't*  
454 *think. – Interview #13 (Student)*

455 *I think there probably is specific work to be done about developing the telecare*  
456 *telehealth stuff as a skill in its own right, I am certain that the clinicians who do best on a*  
457 *ward round and that kind of thing are not always the same ones who are best doing*  
458 *remote consultations. – Interview #7 (Medical Educator, both settings)*

#### 459 *Theme 7: Learning and teaching content*

460 Medical educators in favour of teleconsultation education highlighted specific learning  
461 and teaching content such as the opportunities and limitations of high-quality, safe,  
462 patient-centred telehealth. It was highlighted that these discussions should cover the  
463 limited possibilities for physical examination, potential technical difficulties, and  
464 confidentiality concerns.

465 *The preparation for teleconsultations is significant. Learning about the 'red flags'*  
466 */triggers for organising a follow-up F2F [face-to-face] appointment is still ongoing and I*  
467 *think that I am not expert at that yet. – Questionnaire response #70 (Medical Educator,*  
468 *both settings)*

469 *So, for example, somebody tries to show you a rash on a screen that is a bit blurry or*  
470 *pixelated and we just couldn't see anything at all. So, I think it's important that people*  
471 *[clinicians, students] don't feel pushed into making a decision on the basis of inadequate*



472 *information I think that- that can be quite dangerous. – Interview #1 (Medical Educator,*  
473 *healthcare setting)*

474 Students discussed that it would be essential to be taught how to ensure  
475 professionalism and patient confidentiality:

476 *I think more so like confidentiality issues and so ... if you leave a voicemail like can you*  
477 *say who's calling and like from where that kind of thing, so, I think it would be more*  
478 *issues about confidentiality ... – Interview #15 (Student)*

479 Furthermore, both students and educators mentioned that teleconsultation education  
480 should comprise appropriate methods for documenting remote encounters with patients  
481 and learning how to navigate the virtual consultation environment:

482 *Documentation, I think, making sure that people you know are taking appropriate clinical*  
483 *notes so you know you need to record this consultation in exactly the same way as you*  
484 *would normally ... What happens if that [connection] breaks down, what we gonna do.*  
485 *We can't see things properly, so we have a backup telephone number ... so for example*  
486 *in Near Me, the patient's telephone number comes up on the screen, so you do have a*  
487 *note of it but if you lose the connection, you lose the telephone number. – Interview #1*  
488 *(Medical Educator, healthcare setting)*

489 *Asking if the patient can see us, can hear us alright ... these are basic things that we*  
490 *may not necessarily ask the patient if they're in person, but you would need to ask that if*  
491 *you're talking to them virtually, of course. – Interview #7 (Student)*

492 *Theme 8: The future of teleconsultation education*

493 The general opinion was that teleconsultations would continue to be an integral part of  
494 healthcare. It was highlighted that learning should take place in both academic and  
495 clinical learning environments. Online placements should be offered to students,  
496 allowing them to actively practice remote consultations as opposed to observing  
497 clinicians consulting with patients remotely:

498 *(...) they've [students] maybe done some simulations in their universities first and they*  
499 *thought through the fact that they weren't going to be able to avoid telecommunication,*  
500 *then I think they might come with more informed questions about how to develop their*  
501 *practice ... so, I think it's interesting to think about how they could come better*  
502 *prepared. – Interview #2 (Medical Educator, healthcare setting)*

503 *If I had the ability to include within my clinic the time to allow a student to make the*  
504 *phone call initially to then be able to discuss the case with them and call the family back*  
505 *or to take over the consultation to make the plan. I think it would give the students a*  
506 *real-life rather than virtual learning experience in terms of remote consultation. –*  
507 *Interview #2 (Medical Educator, healthcare setting)*

508 Interview responses indicated that teleconsultation education in both academic and  
509 clinical learning environments faces challenges. Whilst the medical curriculum is  
510 content-rich and adding teleconsultation education is not necessarily perceived as a  
511 priority by students, clinical placements that focus solely on teleconsultations might not  
512 be as educational for students and take away from other clinical skills:

513 *It [teleconsultation education] would be helpful, definitely but then I don't know I feel like*  
514 *there's so many other like priorities, that it's something that you end up just picking up*  
515 *you know ... I think they probably just don't have enough time to squeeze it in, and it's*  
516 *considered low priority. – Interview #5 (Student)*

517 *But if you're watching somebody else do teleconsultation ... it's really hard to*  
518 *concentrate on ... you're watching someone on the phone, so dull to watch, but doing it*  
519 *is completely different as like ... you're actually doing it, so it's a lot more interesting. –*  
520 *Interview #13 (Student)*

521 *All virtual consultations limits face to face clinical examination skills learning for*  
522 *students. – Questionnaire Response #15 (Medical Educator, healthcare setting)*

523

## 524 Discussion

525 This mixed-methods study investigated the opinions of teleconsultation in clinical  
526 practice and the opinions of utilising teleconsultation in undergraduate medical  
527 education within the UK. Medical students and medical educators had diverse opinions  
528 of the use of teleconsultation in practice. Whilst remote consultations might allow  
529 patients to be flexible and ensure more person-centred care, a large percentage of  
530 participants were critical of the advantages of teleconsultation in terms of offering safe  
531 and high-quality care, building rapport, ensuring equal and easy access to healthcare,  
532 saving time, and being appropriate to all patients' health and social care needs. Even  
533 though some participants questioned the extent of education needed to acquire skills

534 and competencies for teleconsultations, most participants highlighted the need for some  
535 teleconsultation education within the academic and clinical setting.

## 536 Patient confidentiality, safety, and accessibility

537 The findings of this mixed-methods study contribute to the body of evidence hinting at  
538 mixed opinions of telehealth in medical practice regarding patient confidentiality, patient  
539 safety, and accessibility to services (62–65). This paper specifically investigated the  
540 opinions of medical students and medical educators in both clinical and academic  
541 practice. The results indicated that teleconsultations increase concerns about patients’  
542 confidentiality, even though the benefits of seeing patients in their home environment  
543 and increasing access to care have been highlighted as an advantage in both  
544 quantitative and qualitative data.

545 Newly qualified doctors are required to communicate with patients “respecting  
546 confidentiality and maintaining professional standards of behaviour” (66). Living  
547 arrangements can introduce additional barriers to accessing telehealth services as  
548 privacy concerns (e.g. no private space for a teleconsultation) might impose challenges,  
549 particularly for people of lower socioeconomic status (67). The potential risk of being  
550 overheard might distract patients and decrease the opportunities to share essential,  
551 sensitive information (42,68). The findings in this study showed that participants’  
552 opinions of implementing teleconsultation education into medical education are  
553 ambiguous. As concerns around confidentiality were a key factor shaping those  
554 opinions, the literature discusses telehealth competencies, which acknowledge the  
555 importance of incorporating methods of ensuring patient confidentiality in

556 teleconsultations into medical curricula (35–37). Ethical medical practice in ensuring the  
557 patients' confidentiality and privacy is applicable to both in-person and telehealth  
558 practices; however, specific considerations in remote consultations must be made  
559 (35,36). Experiences from clinical practice recommended discussions around ensuring  
560 privacy on patient, healthcare professional, clinical, and policy levels (69).  
561 Recommendations such as encouraging professionals and patients to use headphones,  
562 seeking a private room whenever possible, avoiding recording the consultations (69),  
563 and the use of platforms that comply with national regulations (70) are probably most  
564 appropriate for the UK undergraduate medical education context.

565 Within this study, patient-specific factors such as competencies in the use of  
566 technology, access to technologies, and digital literacy were perceived as important  
567 factors to consider in both clinical practice and medical education. These findings are in  
568 line with reports across telehealth literature which advocate for assessing patient factors  
569 to improve patient safety and satisfaction when engaging in remote consultations  
570 (42,64,65,71,72). Practitioners need to assess the patients' competencies and  
571 confidence levels in using technologies for remote consultations to successfully tailor  
572 healthcare to the patients' needs (73,74). In addition, the effective, safe use of  
573 teleconsultations is also dependent digital literacy (42,71,72). Digital literacy refers to  
574 the skills required to retrieve and apply healthcare information and knowledge utilising  
575 technology (75). Patients should have these abilities and the resources to engage in  
576 remote consultations. Healthcare professionals need a profound understanding of digital  
577 literacy and its importance for equal access to healthcare (76) to adequately address  
578 their patients' needs.

579 Ultimately, the use of teleconsultations should neither jeopardise patient safety and  
580 quality of care nor increase inequalities in healthcare for vulnerable population groups  
581 (73,74), as teleconsultations will gain importance around global healthcare systems.  
582 Initiatives that foster the population’s digital skills and ultimately their ability to  
583 understand, retrieve, and act on information given in a remote consultation are essential  
584 to ensure an ongoing safe healthcare delivery in a digitised healthcare setting (77). On  
585 a policy level, awareness should be raised that access to adequate and affordable  
586 technology is an important social determinant of health, influencing most aspects  
587 defined by Dahlgren and Whitehead (78).

588

## 589 Clinical appropriateness and workflow

590 Study results indicate that teleconsultations might save time for patients and reduce  
591 risks of transmitting infectious diseases. However, study participants remarked on the  
592 need for assessing the appropriateness of teleconsultations over in-person interactions.  
593 Previous authors have highlighted the need for assessing “patient and practice  
594 readiness and impact” (35) and “patient safety and appropriateness use of telehealth”  
595 (36). Undergraduate education should therefore prepare students to be able to make  
596 this assessment of whether a teleconsultation is clinically appropriate or not. This  
597 includes but is not limited to evaluating the benefits and risks of consulting with patients  
598 remotely and understanding clinical indicators for transferring remote interactions to in-  
599 person consultations (35). Providing high-quality, safe, effective, and efficient care  
600 utilising remote consultations requires medical practitioners to correctly recognise when

601 patients might be in urgent need of emergency medical treatment (79). Undergraduate  
602 medical education could help students develop these skills by increasing their  
603 awareness of different decision-making and clinical reasoning processes required  
604 during teleconsultations.

605 Additionally, the clinical environment should be ready for teleconsultations. As both the  
606 interviews and questionnaire responses indicated, introducing teleconsultations might  
607 increase the complexity of existing clinical workflows. Farr et al. (20) evaluated the  
608 implementation of a remote consultation system and found that medical practitioners felt  
609 frustrated by the duplication of work and additional time requirements when patients  
610 need to be seen in person following a remote consultation. Reportedly, the seamless  
611 integration of hybrid working arrangements that entail switching between in-person and  
612 remote consultations in clinical practice often constitutes a barrier and reduces uptake  
613 rates of teleconsultations (80). And even though participants in this study perceived the  
614 closeness to the patients' living environments to be benefitting a person-centred  
615 approach, limitations in building rapport and communicating effectively and safely using  
616 technology were stressed as caveats or disadvantages. If those concerns remain unmet  
617 in medical education, patients' safety can be negatively impacted (81). Teleconsultation  
618 education should therefore ensure that students are skilled in taking a history and  
619 adapting their assessment skills where necessary and possible (82). This could be  
620 achieved through simulated teleconsultations or more opportunities for students to  
621 practice teleconsultations in clinical settings (81,82).

## 622 Implications for medical education

623 The results indicated that teleconsultation should be included in medical education, but  
624 the implementation requires careful consideration of learning content, context, and  
625 outcomes. Quantitative and qualitative data have shown different results: As students  
626 who were exposed to teleconsultations in clinical practice were more likely to favour the  
627 implementation of teleconsultation education into medical education, medical  
628 practitioners are on average questioning the need to formally implement  
629 teleconsultation education. In the interviews, students were more sceptical about  
630 including additional content into already dense curricula. Nevertheless, the literature  
631 supports the assumption that training the workforce is fundamental to ensure safe,  
632 effective teleconsultations and to sustainably integrate remote consultations in hybrid  
633 clinical workflows (33,42). Considering the most likely hybrid future of healthcare  
634 delivery, the medical curricula must imbed teleconsultation skills in medical education.  
635 The findings from this study could serve as helpful guidance for medical educators to  
636 consider the implementation of teleconsultation.

637 The content of teleconsultation education is dependent on the learning context. The  
638 findings of this study relate to the UK context, in which medical education is usually an  
639 undergraduate program; however, exemptions may apply regionally. Furthermore,  
640 postgraduate courses or continuous professional development courses and diplomas  
641 that specialise in telehealth more broadly often aim to develop effective leadership  
642 and/or influence policymaking. A UK example is the postgraduate programme “Leading  
643 Digital Transformation in Health and Care for Scotland” (83). Nevertheless, in the  
644 context of this study, results partially support previous suggestions to differentiate



645 between “universal fundamentals” and “telehealth specifics” (84). Whilst the former  
646 constitutes the education on medical principles such as high-quality, person-centered,  
647 ethical care, the latter specifically advocates for an adaptation of these principles in  
648 remote consultation settings (29,34,38,70,84–86). By adding practical learning  
649 experiences in both simulated and clinical learning environments (24,27,87), future  
650 practitioners will be able to adequately analyse the benefits and risks of utilising  
651 teleconsultation, learn different strategies for communicating effectively and safely in  
652 remote settings, and explore discipline-specific applications of teleconsultations (73).

653 Continuous educational research is conducted to further develop evidence-informed  
654 education for undergraduate medical students including teleconsultation and the more  
655 broader realm of telehealth (27,87,88). Discussion at medical schools and clinical  
656 placements should be encouraged including the impact of teleconsultations on patient  
657 confidentiality and safety, the accessibility to healthcare, the assessment of the clinical  
658 appropriateness of teleconsultations, and the implications on clinical workflows. In any  
659 case, the use of teleconsultation should be evaluated thoroughly to not unintendedly  
660 increase the digital divide in vulnerable population groups and therefore increase health  
661 inequalities (73).

662

## 663 **Study limitations**

664 The findings provide a cross-sectional picture of undergraduate medical students’ and  
665 medical educators’ opinions of teleconsultation practice and education within the UK.  
666 However, the response rate of the online questionnaire was low. This might be

667 explained by limitations of the sampling strategy, survey fatigue, or the stress on  
668 educators and students involved in the healthcare and education system during the  
669 peak of the COVID-19 pandemic. Additionally, the participants were unevenly spread  
670 across the four UK countries which impeded a justification for sub-group analyses. The  
671 snowball sampling techniques and self-selection applied to the semi-structured  
672 interviews could have limited data saturation as important stakeholders and participants  
673 may have withheld their opinions or may not have been reached by the online  
674 questionnaire in the first place. Furthermore, the period for data collection extended  
675 over 13 months and as the pandemic unfolded, changes in opinions might have  
676 occurred. However, an analysis of changes over time was not the aim of this study.

## 677 Conclusion

678 With the ongoing development of a digitised health and social care system, there is an  
679 increasing demand for a skilled workforce. The medical educators and medical students  
680 in this mixed-methods study perceived teleconsultation ambiguously, highlighting the  
681 advantages but also the fundamental disadvantages of teleconsultations in practice This  
682 ambiguity may be reflective of when the study took place during a time when  
683 teleconsultations were a necessity during COVID-19 restrictions. Teleconsultation  
684 should not be a replacement for in-person health and social care where the latter is  
685 needed, nor should teleconsultation education replace the teaching of in-person  
686 consultation skills. However, medical education should ensure that the future workforce  
687 is adequately prepared for effective and safe teleconsultation practice and also ensure

688 that students are equipped with the knowledge to make choices around the appropriate  
689 use of remote consultations over in-person consultations.

## 690 References

- 691 1. Bradford N, Caffery L, Smith A. Telehealth services in rural and remote Australia: A  
692 systematic review of models of care and factors influencing success and sustainability.  
693 *Rural Remote Health*. 2016;16:3808–31.
- 694 2. Glinkowski W, Pawlowska K, Kozłowska L. Telehealth and telenursing perception and  
695 knowledge among university students of nursing in Poland. *Telemed E-Health*. 2013  
696 Jul;19(7):523–9.
- 697 3. Rutledge C, Kott K, Schweickert P, Poston R, Fowler C, Haney T. Telehealth and eHealth in  
698 nurse practitioner training: current perspectives. *Adv Med Educ Pract*. 2017  
699 Apr;2017(8):399–409.
- 700 4. The Scottish Government. A national telehealth and telecare delivery plan for Scotland to  
701 2015: Driving improvement, integration and innovation [Internet]. Edinburgh; 2012 Dec  
702 [cited 2024 Jan 31]. Available from: [https://www.gov.scot/publications/national-telehealth-  
703 telecare-delivery-plan-scotland-2016-driving-improvement-integration-innovation/](https://www.gov.scot/publications/national-telehealth-telecare-delivery-plan-scotland-2016-driving-improvement-integration-innovation/)
- 704 5. World Health Organization and International Telecommunication Union. WHO-ITU global  
705 standard for accessibility of telehealth services [Internet]. Geneva; 2022 Jan [cited 2024 Jan  
706 28]. Available from: <https://www.who.int/publications/i/item/9789240050464>
- 707 6. Honeyman M, Dunn P, McKenna H. A digital NHS? An introduction to the digital agenda  
708 and plans for implementation [Internet]. 2016 [cited 2024 Mar 10]. Available from:  
709 <https://www.kingsfund.org.uk/insight-and-analysis/reports/digital-nhs>
- 710 7. Imison C, Castle-Clarke S, Watson R, Edwards N. Delivering the benefits of digital health  
711 care [Internet]. 2016 Feb [cited 2024 Feb 28]. Available from:  
712 <https://www.nuffieldtrust.org.uk/research/delivering-the-benefits-of-digital-health-care>
- 713 8. Karan A, Wadhwa RK. Healthcare system stress due to Covid-19: Evading an evolving  
714 crisis. *J Hosp Med*. 2021 Feb;16(2):127–127.
- 715 9. Contreras CM, Metzger GA, Beane JD, Dedhia PH, Ejaz A, Pawlik TM. Telemedicine:  
716 Patient-provider clinical engagement during the COVID-19 pandemic and beyond. *J  
717 Gastrointest Surg*. 2020 May;24(7):1692–7.
- 718 10. Fisk M, Livingstone A, Pit SW. Telehealth in the context of COVID-19: changing  
719 perspectives in Australia, the United Kingdom, and the United States. *J Med Internet Res*.  
720 2020 Jun;22(6):e19264.
- 721 11. Greenhalgh T, Wherton J, Shaw S, Morrison C. Video consultations for COVID-19. *BMJ*.  
722 2020 Mar;368:m998.
- 723 12. NHS England. GP Patient Survey [Internet]. 2022 [cited 2024 Jan 31]. Available from:  
724 <https://gp-patient.co.uk/surveysandreports2022>

- 725 13. Phuong J, Ordóñez P, Cao J, Moukheiber M, Moukheiber L, Caspi A, et al. Telehealth and  
726 digital health innovations: A mixed landscape of access. Kalua K, editor. PLOS Digit Health.  
727 2023 Dec 15;2(12):e0000401.
- 728 14. World Health Organization. Recommendations on digital interventions for health system  
729 strengthening [Internet]. 2019 [cited 2024 Mar 10]. Available from:  
730 <https://www.who.int/publications/i/item/9789241550505>
- 731 15. Lurie N, Carr BG. The role of telehealth in the medical response to disasters. JAMA Intern  
732 Med. 2018 Jun;178(6):745–6.
- 733 16. Terry DL, Buntoro SP. Perceived usefulness of telehealth among rural medical providers:  
734 barriers to use and associations with provider confidence. J Technol Behav Sci. 2021  
735 Jun;6(4):567–71.
- 736 17. Deldar K, Bahaadinbeigy K, Tara SM. Teleconsultation and clinical decision making: A  
737 systematic review. Acta Inform Medica. 2016 Jul;24(4):286–92.
- 738 18. Carrillo De Albornoz S, Sia KL, Harris A. The effectiveness of teleconsultations in primary  
739 care: Systematic review. Fam Pract. 2022 Jan;39(1):168–82.
- 740 19. Kludacz-Alessandri M, Hawrysz L, Korneta P, Gierszewska G, Pomaranik W, Walczak R.  
741 The impact of medical teleconsultations on general practitioner-patient communication  
742 during COVID- 19: A case study from Poland. PLOS ONE. 2021 Jul;16(7):e0254960.
- 743 20. Farr M, Banks J, Edwards HB, Northstone K, Bernard E, Salisbury C, et al. Implementing  
744 online consultations in primary care: A mixed-method evaluation extending normalisation  
745 process theory through service co-production. BMJ Open. 2018 Mar;8(3):e019966.
- 746 21. Marshall M, Shah R, Stokes-Lampard H. Online consulting in general practice: Making the  
747 move from disruptive innovation to mainstream service. BMJ. 2018 Mar;k1195.
- 748 22. Wherton J, Greenhalgh T. Evaluation of the Attend Anywhere/Near Me video consulting  
749 service in Scotland, 2019-20 [Internet]. Edinburgh: The Scottish Government; 2020 Jul  
750 [cited 2024 Jan 15]. Available from: [https://www.gov.scot/publications/evaluation-attend-  
751 anywhere-near-video-consulting-service-scotland-2019-20-main-report/](https://www.gov.scot/publications/evaluation-attend-anywhere-near-video-consulting-service-scotland-2019-20-main-report/)
- 752 23. The Scottish Government. Urgent care services - Near Me in NHS Greater Glasgow and  
753 Clyde's flow navigation centre: good practice example [Internet]. Edinburgh; 2022 Jul [cited  
754 2024 Jan 31]. Available from: [https://www.gov.scot/publications/near-redesign-urgent-care-  
755 integrating-everyday-use-nhs-greater-glasgow-clydes-flow-navigation-centre-good-practice-  
756 example/pages/3/](https://www.gov.scot/publications/near-redesign-urgent-care-integrating-everyday-use-nhs-greater-glasgow-clydes-flow-navigation-centre-good-practice-example/pages/3/)
- 757 24. Gunner CK, Eisner E, Watson AJ, Duncan JL. Teaching webside manner: Development and  
758 initial evaluation of a video consultation skills training module for undergraduate medical  
759 students. Med Educ Online. 2021 Jul;26(1):1954492.
- 760 25. Lee IR, Kim HW, Lee Y, Koyanagi A, Jacob L, An S, et al. Changes in undergraduate  
761 medical education due to COVID-19: A systematic review. Eur Rev Med Pharmacol Sci.  
762 2021 Jun;25(12):4426–34.

- 763 26. Rutledge C, Hawkins EJ, Bordelon M, Gustin TS. Telehealth education: An interprofessional  
764 online immersion experience in response to COVID-19. *J Nurs Educ*. 2020 Sep;59(10):570–  
765 6.
- 766 27. Wetzlmair LC, O’Carroll V, O’Malley AS, Murray S. Teleconsultation in health and social  
767 care professions education: A systematic review. *Clin Teach*. 2022 Jul;19(5):e13519.
- 768 28. DeJong C, Lucey CR, Adams Dudley R. Incorporating a new technology while doing no  
769 harm, virtually. *JAMA*. 2015 Dec;314(22):2351–2.
- 770 29. Davies A, Mueller J, Moulton G. Core competencies for clinical informaticians: A systematic  
771 review. *Int J Med Inf*. 2020 Sep;141:104237.
- 772 30. NHS Education for Scotland. Workforce Plan 2019/20 - NHS Education for Scotland  
773 Strategy 2019-2024 [Internet]. Edinburgh; 2019 Aug [cited 2024 Jan 20]. Available from:  
774 [https://www.nes.scot.nhs.uk/media/gxoj24tm/nes-workforce-plan-2019\\_20.pdf](https://www.nes.scot.nhs.uk/media/gxoj24tm/nes-workforce-plan-2019_20.pdf)
- 775 31. Ross J, Stevenson F, Lau R, Murray E. Factors that influence the implementation of e-  
776 health: A systematic review of systematic reviews (an update). *Implement Sci*. 2016  
777 Oct;11(1):146–58.
- 778 32. Terry C, Cain J. The emerging issue of digital empathy. *Am J Pharm Educ*. 2016  
779 May;80(4):58–62.
- 780 33. Thomas EE, Haydon HM, Mehrotra A, Caffery LJ, Snoswell CL, Banbury A, et al. Building  
781 on the momentum: Sustaining telehealth beyond COVID-19. *J Telemed Telecare*. 2022  
782 May;28(4):301–8.
- 783 34. Brunner M, McGregor D, Keep M, Janssen A, Spallek H, Quinn D, et al. An eHealth  
784 capabilities framework for graduates and health professionals: Mixed-methods study. *J Med*  
785 *Internet Res*. 2018 May;20(5):e10229.
- 786 35. Galpin K, Sikka N, King SL, Horvath KA, Shipman SA, Committee ATA. Expert consensus:  
787 Telehealth skills for health care professionals. *Telemed J E Health*. 2021 Jul;27(7):820–4.
- 788 36. Noronha C, Lo MC, Nikiforova T, Jones D, Nandiwada DR, Leung TI, et al. Telehealth  
789 competencies in medical education: New frontiers in faculty development and learner  
790 assessments. *J Gen Intern Med*. 2022 Apr;37(12):3168–73.
- 791 37. Poncette AS, Glauert DL, Mosch L, Braune K, Balzer F, Back D. Undergraduate medical  
792 competencies in digital health and curricular module development: Mixed methods study.  
793 *Joural Med Internet Res*. 2020 Oct;22(10):e22161.
- 794 38. Pit SW, Velovski S, Cockrell K, Bailey J. A qualitative exploration of medical students’  
795 placement experiences with telehealth during COVID-19 and recommendations to prepare  
796 our future medical workforce. *BMC Med Educ*. 2021 Aug;21(1):431–44.
- 797 39. Muntz MD, Franco J, Ferguson CC, Ark TK, Kalet A. Telehealth and medical student  
798 education in the time of COVID-19 - and beyond. *Acad Med*. 2021 Dec;96(12):1655–9.

- 799 40. Chike-Harris KE, Durham C, Logan A, Smith G, DuBose-Morris R. Integration of telehealth  
800 education into the health care provider curriculum: A review. *Telemed E-Health*. 2021  
801 Feb;27(2):137–49.
- 802 41. Levy S. Nurse Education in the Digital Age—A Perspective From the United Kingdom. In:  
803 Shachak A, Borycki EM, Reis SP, editors. *Health Professionals' Education in the Age of*  
804 *Clinical Information Systems, Mobile Computing and Social Networks* [Internet]. Elsevier;  
805 2017 [cited 2024 Mar 1]. p. 289–97. Available from:  
806 <https://linkinghub.elsevier.com/retrieve/pii/B9780128053621000140>
- 807 42. Almathami HKY, Win KT, Vlahu-Gjorgievska E. Barriers and facilitators that influence  
808 telemedicine-based, real-time, online consultation at patients' homes: Systematic literature  
809 review. *J Med Internet Res*. 2020 Feb;22(2):e16407.
- 810 43. Johnson RB, Onwuegbuzie AJ. Mixed methods research: A research paradigm whose time  
811 has come. *Educ Res*. 2004 Oct;33(7):14–26.
- 812 44. Johnson RB, Onwuegbuzie AJ, Turner LA. Toward a definition of mixed methods research.  
813 *J Mix Methods Res*. 2007 Apr;1(2):112–33.
- 814 45. Creswell JD, Creswell JW. *Research design: Qualitative, quantitative, and mixed methods*  
815 *approaches*. Sixth edition. Sage Publications; 2023.
- 816 46. Morgan DL. *Integrating qualitative and quantitative methods. A pragmatic approach*. SAGE  
817 Publications, Inc; 2014.
- 818 47. Alwashmi MF, Hawboldt J, Davis E, Fetters MD. The iterative convergent design for mobile  
819 health usability testing: Mixed methods approach. *JMIR MHealth UHealth*. 2019  
820 Apr;7(4):e11656.
- 821 48. Proudfoot K. Inductive/deductive hybrid thematic analysis in mixed methods research. *J Mix*  
822 *Methods Res*. 2022 Sep;17(3):308–26.
- 823 49. Davis FD. Perceived usefulness, perceived ease of use, and user acceptance of information  
824 technology. *MIS Q*. 1989;13(3):319–40.
- 825 50. Worthington RL, Whittaker TA. Scale development research: A content analysis and  
826 recommendations for best practices. *Couns Psychol*. 2006 Nov;34(6):806–38.
- 827 51. Qualtrics. Qualtrics [Internet]. 2020 [cited 2023 Jul 1]. Available from:  
828 <https://www.qualtrics.com/uk/>
- 829 52. Microsoft. Microsoft Teams [Internet]. 2022 [cited 2023 Jul 1]. Available from:  
830 <https://www.microsoft.com/en/microsoft-teams/log-in>
- 831 53. Guest G, MacQueen KM, Namey EE. *Applied Thematic Analysis*. SAGE Publications, Inc;  
832 2012.
- 833 54. Taherdoost H. Sampling methods in research methodology; How to choose a sampling  
834 technique for research. *Int J Acad Res Manag*. 2016 Apr;5(2):18–27.

- 835 55. Boone HN, Boone DA. Alaying likert scale. *J Ext.* 2012 Apr;50(2).
- 836 56. Khamis H. Measures of association: How to choose? *J Diagn Med Sonogr.* 2008  
837 Mar;24(3):155–62.
- 838 57. Clark-Carter D. Measures of Central Tendency. In: Peterson P, Baker E, McGaw B, editors.  
839 *International Encyclopedia of Education. Third Edition.* Elsevier; 2010. p. 264–6.
- 840 58. Corp IBM. IBM SPSS Statistics for Windows [Internet]. IBM; 2019 [cited 2023 Jul 1].  
841 Available from: <https://www.ibm.com/support/pages/downloading-ibm-spss-statistics-26>
- 842 59. Microsoft. Microsoft Excel [Internet]. 2021 [cited 2023 Jul 1]. Available from:  
843 <https://office.microsoft.com/excel>
- 844 60. Fereday J, Muir-Cochrane E. Demonstrating rigor using thematic analysis: A hybrid  
845 approach of inductive and deductive coding and theme development. *Int J Qual Methods.*  
846 2006 Mar;5(1):80–92.
- 847 61. Lumivero. NVivo [Internet]. 2023 [cited 2023 Nov 7]. Available from:  
848 <https://lumivero.com/products/nvivo/>
- 849 62. Kissi J, Dai B, Dogbe CS, Banahene J, Ernest O. Predictive factors of physicians'  
850 satisfaction with telemedicine services acceptance. *Health Inform J.* 2019 Dec;26(3):1866–  
851 80.
- 852 63. Bostan S, Yesildag AY, Balci F. Family physicians' perspectives on the pros, cons, and  
853 application areas of telemedicine: A qualitative study [Internet]. 2024 [cited 2024 Mar 13].  
854 Available from: <https://www.liebertpub.com/doi/10.1089/tmj.2023.0574>
- 855 64. Judijanto L, Anurogo D, Zani BN, Muhammad D, Ningsih KP. Implementation of  
856 telemedicine in health services: Challenges and opportunities. *J World Future Med Health*  
857 *Nurs.* 2023 Dec;2(1):37–50.
- 858 65. Du Y, Gu Y. The development of evaluation scale of the patient satisfaction with  
859 telemedicine: A systematic review. *BMC Med Inform Decis Mak.* 2024 Feb;24(1):31.
- 860 66. General Medical Council. Outcomes for graduates 2018 [Internet]. 2020 [cited 2024 Mar 1].  
861 Available from: [https://www.gmc-uk.org/education/standards-guidance-and-](https://www.gmc-uk.org/education/standards-guidance-and-curricula/standards-and-outcomes/outcomes-for-graduates)  
862 [curricula/standards-and-outcomes/outcomes-for-graduates](https://www.gmc-uk.org/education/standards-guidance-and-curricula/standards-and-outcomes/outcomes-for-graduates)
- 863 67. Barney A, Buckelew S, Mesheriakova V, Raymond-Flesch M. The COVID-19 pandemic and  
864 rapid implementation of adolescent and young adult telemedicine: Challenges and  
865 opportunities for innovation. *J Adolesc Health.* 2020 Aug;67(2):164–71.
- 866 68. Penny RA, Bradford NK, Langbecker D. Registered nurse and midwife experiences of using  
867 videoconferencing in practice: A systematic review of qualitative studies. *J Clin Nurs.* 2017  
868 Nov;27(5–6):739–52.
- 869 69. Reilly K, Ebersole A. Confidentiality and privacy considerations for adolescents receiving  
870 contraceptive health services via telemedicine: A narrative review. *Womens Health*



- 871 [Internet]. 2024 Feb [cited 2024 Mar 13];20. Available from:  
872 <http://journals.sagepub.com/doi/10.1177/17455057241233126>
- 873 70. Cummins MR, Soni H, Ivanova J, Ong T, Barrera J, Wilczewski H, et al. Narrative review of  
874 telemedicine applications in decentralized research. *J Clin Transl Sci*. 2024 Jan;8(1):e30–  
875 40.
- 876 71. Kruse CS, Karem P, Shifflett K, Vegi L, Ravi K, Brooks M. Evaluating barriers to adopting  
877 telemedicine worldwide: A systematic review. *J Telemed Telecare*. 2016 Oct;24(1):4–12.
- 878 72. Moffatt JJ, Eley DS. Barriers to the up-take of telemedicine in Australia – A view from  
879 providers. *Rural Remote Health*. 2011 Feb;11(1):1581–7.
- 880 73. Gallegos-Rejas VM, Thomas EE, Kelly JT, Smith AC. A multi-stakeholder approach is  
881 needed to reduce the digital divide and encourage equitable access to telehealth. *J*  
882 *Telemed Telecare*. 2023 Jan;29(1):73–8.
- 883 74. Reed ME, Huang J, Graetz I, Lee C, Muelly E, Kennedy C, et al. Patient characteristics  
884 associated with choosing a telemedicine visit vs office visit with the same primary care  
885 clinicians. *JAMA Netw Open*. 2020 Jun;3(6):e205873–e205873.
- 886 75. Norman CD, Skinner HA. eHealth literacy: Essential skills for consumer health in a  
887 networked world. *J Med Internet Res*. 2006 Jun;8(2):e9.
- 888 76. Haupteltshofer A, Egerer V, Seeling S. Promoting health literacy: What potential does  
889 nursing informatics offer to support older adults in the use of technology? A scoping review.  
890 *Health Inform J*. 2020 Jul;26(4):2707–21.
- 891 77. The Scottish Council for Voluntary Organisations. Connecting Scotland - supporting  
892 everyone in Scotland to get online. 2024 [cited 2024 Feb 29]. Connecting Scotland -  
893 supporting everyone in Scotland to get online. Available from: <https://connecting.scot/>
- 894 78. Dahlgren G, Whitehead M. The Dahlgren-Whitehead model of health determinants: 30  
895 years on and still chasing rainbows. *Public Health*. 2021 Oct;199:20–4.
- 896 79. Chu M, Dalwadi S, Profit R, Searle B, Williams H. How should medical education support  
897 increasing telemedicine use following COVID-19? An Asian perspective focused on  
898 teleconsultation. *Int J Digit Health*. 2022 Jan;2(1):1–6.
- 899 80. Cowan KE, McKean AJ, Gentry MT, Hilty DM. Barriers to use of telepsychiatry: Clinicians as  
900 gatekeepers. *Mayo Clin Proc*. 2019 Dec;94(12):2510–23.
- 901 81. Van Galen LS, Wang CJ, Nanayakkara PWB, Paranjape K, Kramer MHH, Car J. Telehealth  
902 requires expansion of physicians' communication competencies training. *Med Teach*. 2019  
903 Jun;41(6):714–5.
- 904 82. Singh M, Collins L, Farrington R, Jones M, Thampy H, Watson P, et al. From principles to  
905 practice: Embedding clinical reasoning as a longitudinal curriculum theme in a medical  
906 school programme. *Diagn Berl*. 2021 Jul;9(2):184–94.

- 907 83. NHS Education for Scotland. Postgraduate Programme: Leading Digital Transformation in  
908 Health and Care for Scotland (PGCert, PGDip, MSc) [Internet]. 2022 [cited 2024 Mar 12].  
909 Available from: [https://www.nes.scot.nhs.uk/news/postgraduate-programme-leading-digital-  
transformation-in-health-and-care-for-scotland-pgcert-pgdip-msc/](https://www.nes.scot.nhs.uk/news/postgraduate-programme-leading-digital-<br/>910 transformation-in-health-and-care-for-scotland-pgcert-pgdip-msc/)
- 911 84. Pourmand A, Ghassemi M, Sumon K, Amini SB, Hood C, Sikka N. Lack of telemedicine  
912 training in academic medicine: Are we preparing the next generation? *Telemed E-Health*.  
913 2021 Jan;27(1):62–7.
- 914 85. Davies A, Mueller J, Hassey A, Moulton G. Development of a core competency framework  
915 for clinical informatics. *BMJ Health Care Inform*. 2021 Jul;28(1):e100356.
- 916 86. Moulton G, Hassey A, Davies A. Faculty of Clinical Informatics Core Competency  
917 Framework [Internet]. The University of Manchester & Faculty of Clinical Informatics; 2020  
918 [cited 2024 Feb 29]. Available from: <https://zenodo.org/records/3957992>
- 919 87. Bouamra B, Chakroun K, Medeiros De Bustos E, Dobson J, Rouge JA, Moulin T.  
920 Simulation-based teaching of telemedicine for future users of teleconsultation and tele-  
921 expertise: Feasibility study. *JMIR Med Educ*. 2021 Dec;7(4):e30440.
- 922 88. Van Der Kleij RMJJ, Kasteleyn MJ, Meijer E, Bonten TN, Houwink EJF, Teichert M, et al.  
923 eHealth in primary care. Part 1: Concepts, conditions and challenges. *Eur J Gen Pract*.  
924 2019 Oct;25(4):179–89.

925

926

# Figures

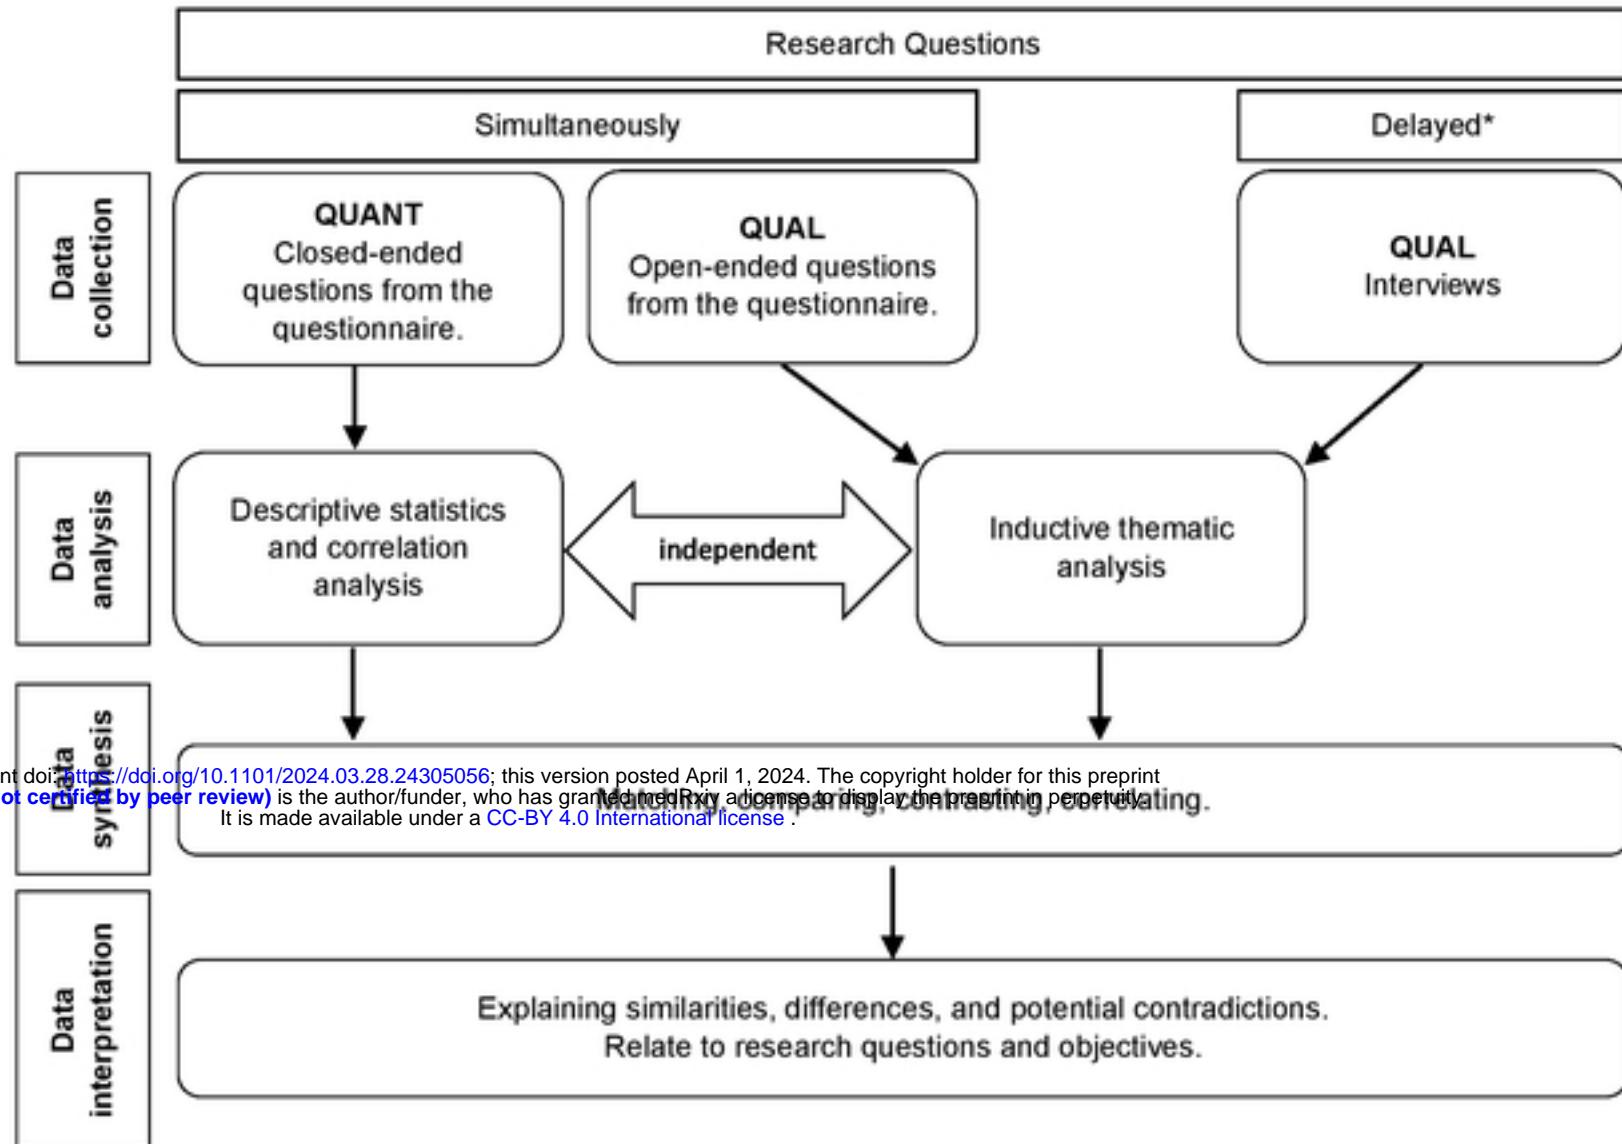

medRxiv preprint doi: <https://doi.org/10.1101/2024.03.28.24305056>; this version posted April 1, 2024. The copyright holder for this preprint (which was not certified by peer review) is the author/funder, who has granted medRxiv a license to display the preprint in perpetuity. It is made available under a [CC-BY 4.0 International license](https://creativecommons.org/licenses/by/4.0/).

Figure 1: Illustration of a convergent mixed-methods design with qualitative priority and quantitative input, based on [45-48]. \*Delay due to the optional sign-up after responding to the questionnaire.
